# Supplementary figures and images for: Mycorrhizal Fungi as Bioprotectors of Crops Against Verticillium Wilt—A Hypothetical Scenario Under Changing Environmental Conditions
Source: MDPI journal article supplement (doi:10.3390/plants9111468), 2020-10-30

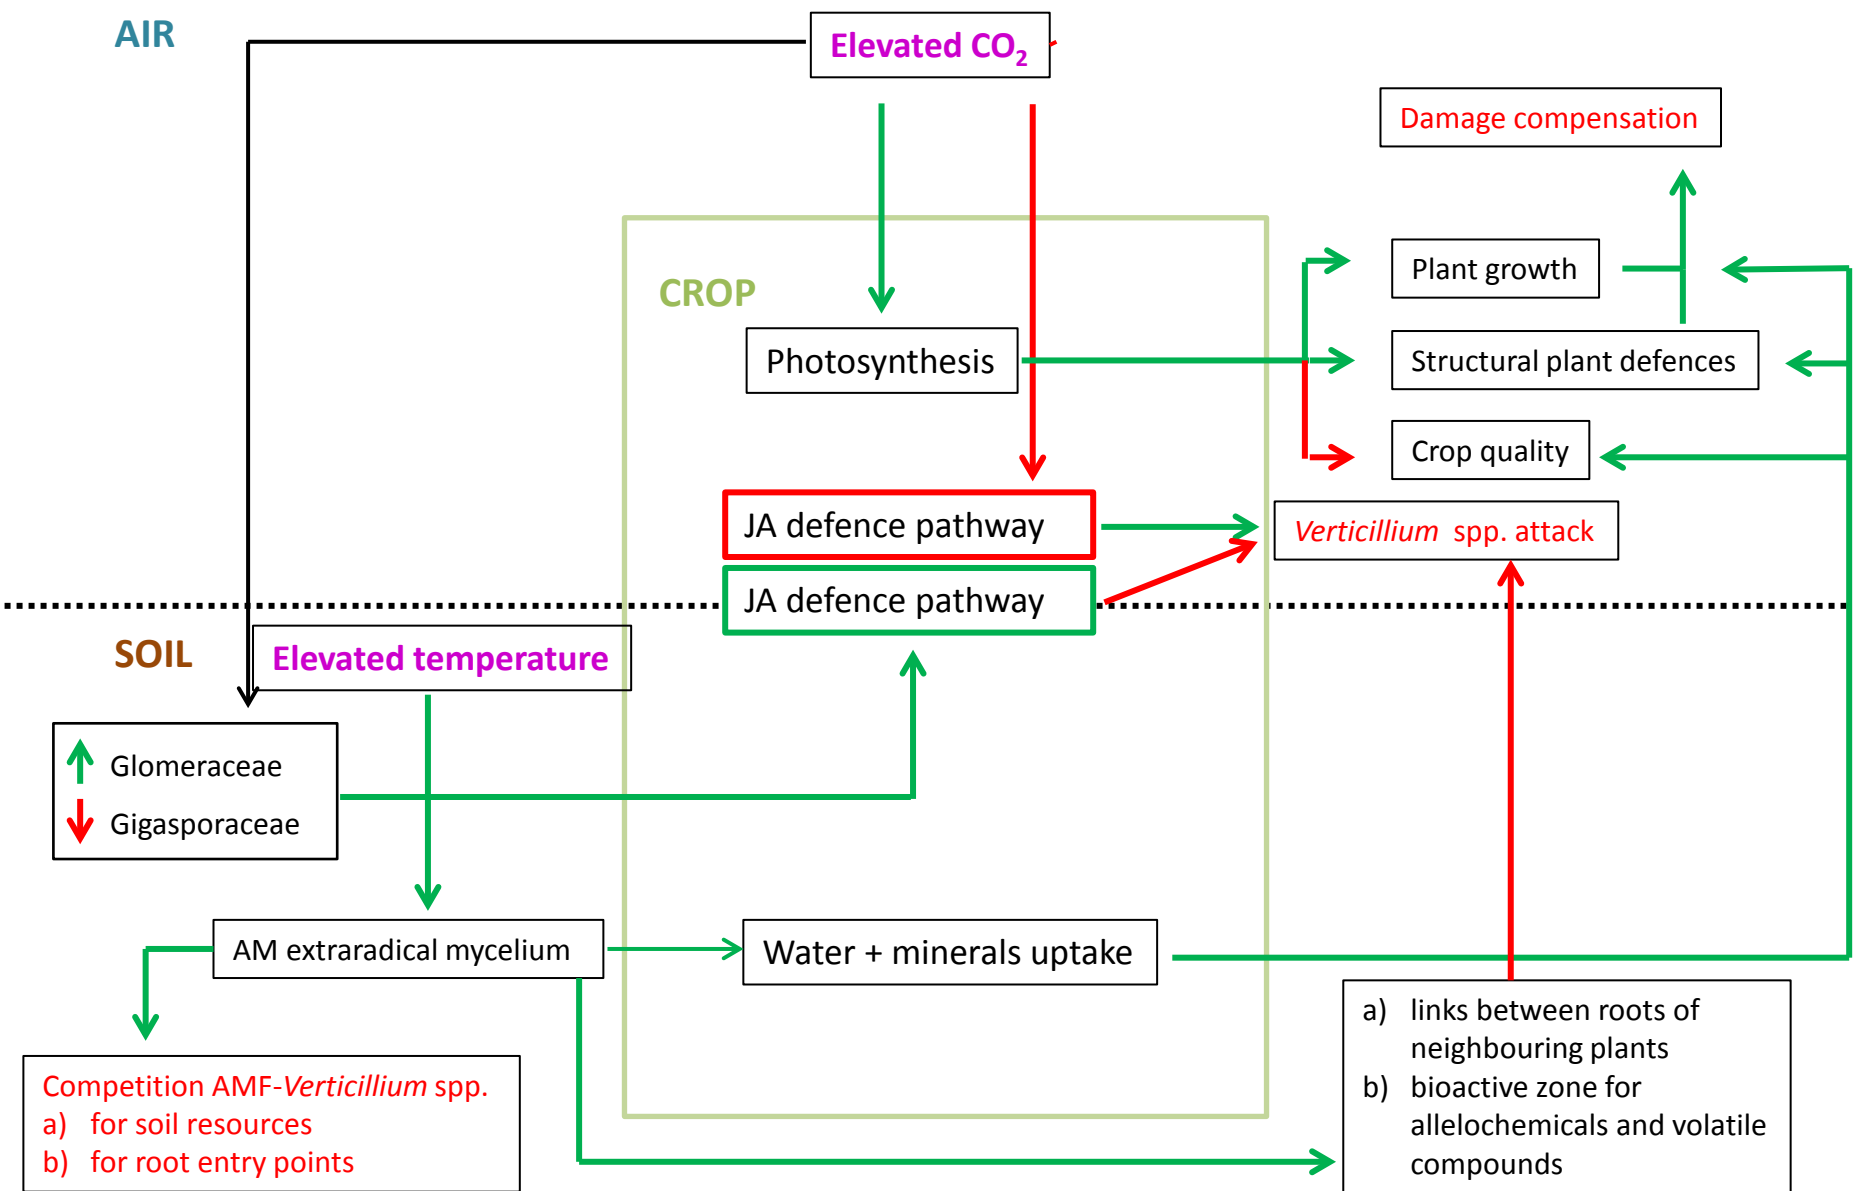

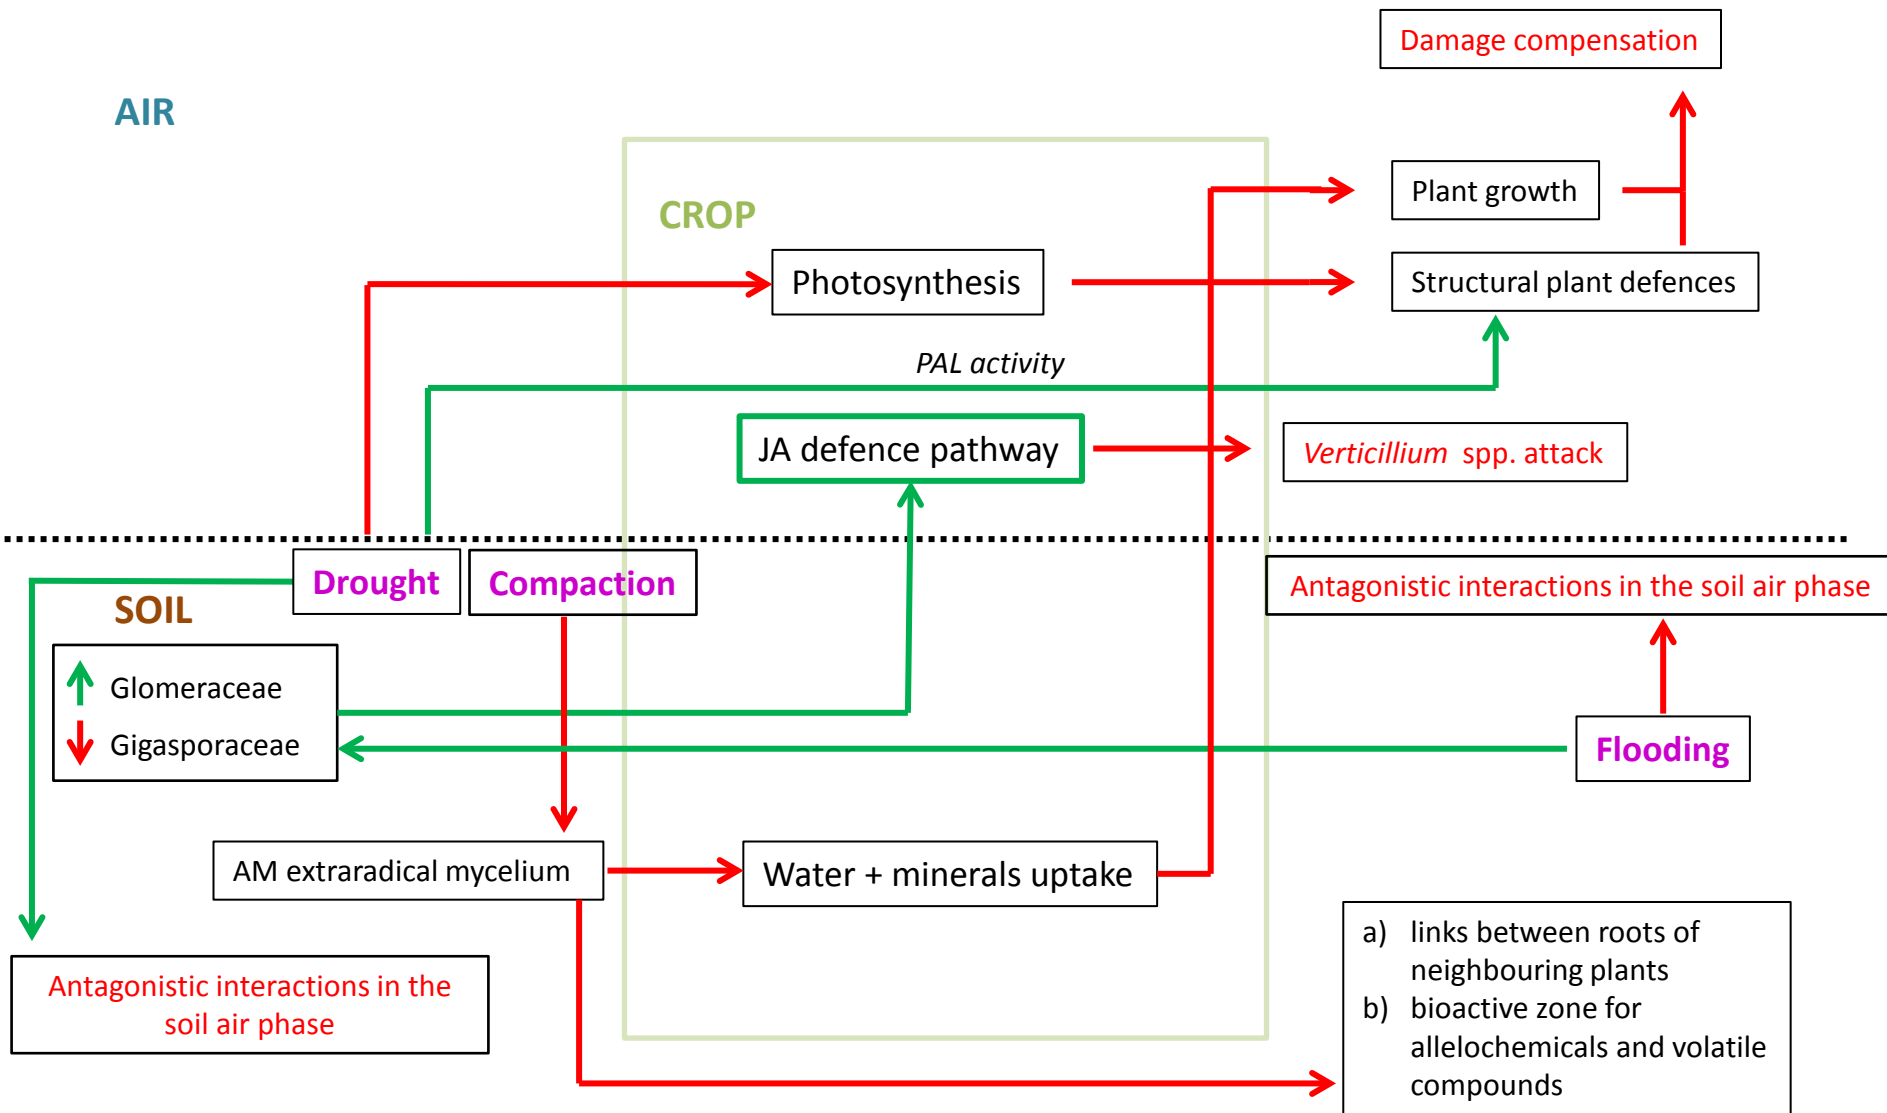

Supplement: s1 [file s1]
